# Supplementary material
Source: PubMed Central journal article supplement (PMC5500785)
Supplement: 10.1074_M116.766527_jbc.M116.766527-1.pdf [file 10.1074_M116.766527_jbc.M116.766527-1.pdf]

## SUPPLEMENTAL DATA

## Structural and Enzymatic Insights into Species-specific Resistance to Schistosome Parasite Drug Therapy

**Alexander B. Taylor<sup>1,3</sup>, Kenneth M. Roberts<sup>1</sup>, Xiaohang Cao<sup>1</sup>, Nathaniel E. Clark<sup>1</sup>, Stephen P. Holloway<sup>1</sup>, Enrica Donati<sup>4</sup>, Chiara M. Polcaro<sup>4</sup>, Livia Pica-Mattoccia<sup>5</sup>, Reid S. Tarpley<sup>6</sup>, Stanton F. McHardy<sup>6</sup>, Donato Cioli<sup>5</sup>, Philip T. LoVerde<sup>1,2</sup>, Paul F. Fitzpatrick<sup>1</sup> and P. John Hart<sup>1,3,7</sup>**

From the <sup>1</sup>Departments of Biochemistry and Structural Biology and <sup>2</sup>Pathology, University of Texas Health Science Center at San Antonio, 7703 Floyd Curl Drive, San Antonio, Texas 78229 USA

<sup>3</sup>*X-ray Crystallography Core Laboratory*, University of Texas Health Science Center at San Antonio, 7703 Floyd Curl Drive, San Antonio, Texas 78229 USA

<sup>4</sup>Institute of Chemical Methodologies, CNR, Rome, Italy

<sup>5</sup>Institute of Cell Biology and Neurobiology, CNR, Rome, Italy

<sup>6</sup>Center for Innovative Drug Discovery, Department of Chemistry, University of Texas at San Antonio, San Antonio, Texas 78249 USA

<sup>7</sup>Department of Veterans Affairs, South Texas Veterans Health Care System, 7400 Merton Minter Boulevard, San Antonio, Texas 78229 USA

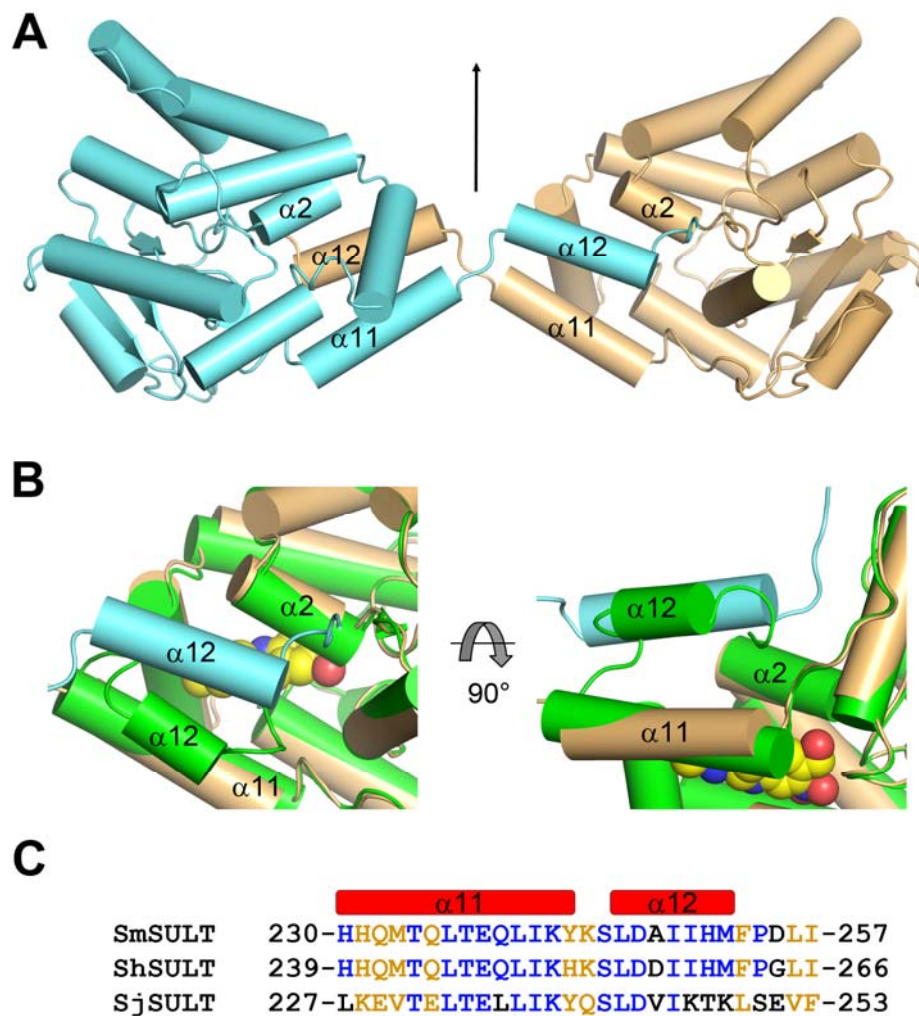

**SUPPLEMENTAL FIGURE 1:** A, structure of the domain swap of the SjsULT C-terminal helix  $\alpha12$  into the neighboring molecule about a crystallographic two-fold axis (shown as an arrow). Individual molecules are shown in cyan and orange. B, illustration of the divergent positions adopted by the  $\alpha12$  helices in SjsULT (orange) and the SmSULT:PAP:oxamniquine complex (green). The left and right panels are rotated  $90^\circ$  with respect to each other. Oxamniquine in the SmSULT structure is shown in sphere representation and colored by atom. The  $\alpha12$  helices in both structures do not interact with oxamniquine (see right panel). C, sequence alignment of schistosome SULT C-termini. Identities are shown in blue and conservative substitutions are shown in orange. SmSULT and ShSULT secondary structures are depicted above the sequence elements.

**A**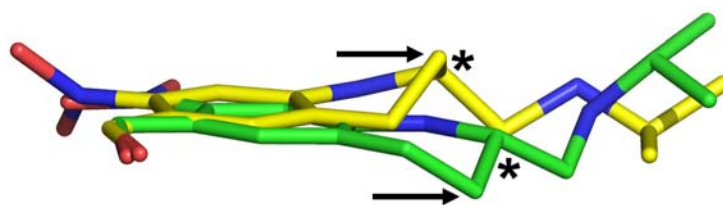**B**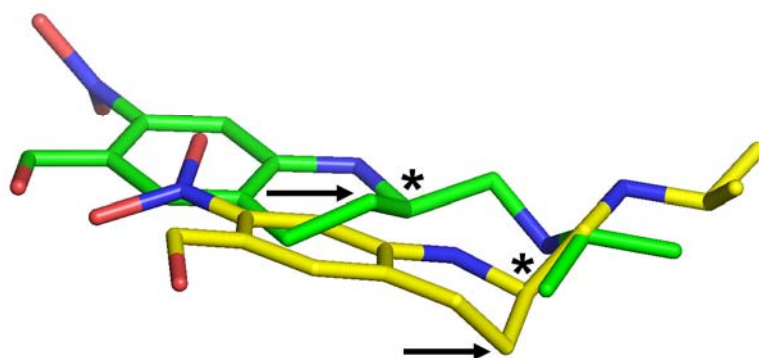

**SUPPLEMENTAL FIGURE 2:** *A*, conformations of *S*-oxamniquine shown in isolation from aligned SmSULT (yellow) and ShSULT (green) complexes. Arrows point to the C3 atoms defining opposite puckers in the piperidine rings and the chiral centers are marked with asterisks. *B*, conformations of *R*-oxamniquine from aligned SmSULT (yellow) and ShSULT (green) complexes marked as in *A*.

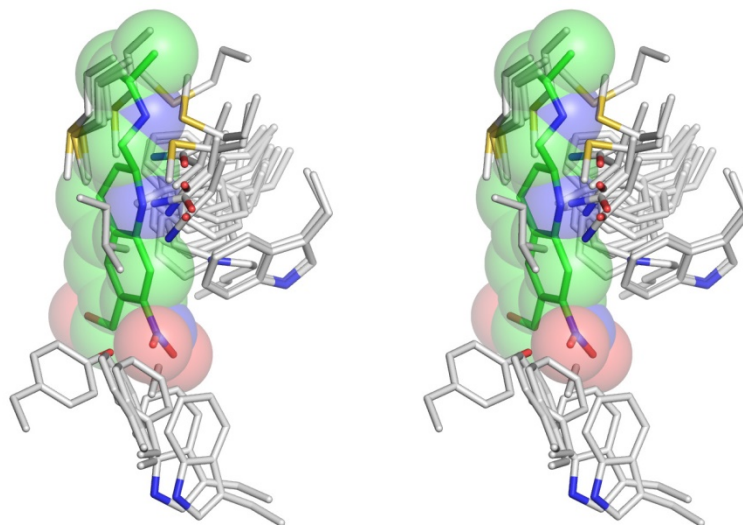

**SUPPLEMENTAL FIGURE 3:** Wall-eyed stereo view of predicted steric interference with oxamniquine in known human SULT active site structures shows that they likely prohibit interaction with oxamniquine. SmSULT (PDB entry 5BYK) was superimposed onto human SULT enzymes using PyMOL. Oxamniquine is shown in green stick representation with transparent spheres. Human SULT residues that would be in the equivalent position of the oxamniquine-binding site in SmSULT are shown in grey [SULT 1A1 (PDB 1LS6), SULT1A3 (PDB 1CJM), SULT1B1 (PDB 2Z5F), SULT1C1 (PDB 3BFX), SULT1C2 (PDB 2GWH), SULT1C3 (PDB 2H8K), SULT 4A1 (PDB 1ZD1), hydroxysteroid SULT (PDB 1EFH), estrogen SULT (PDB 1G3M), dehydroepiandrosterone SULT (PDB 1J99) and tyrosylprotein SULT (PDB 3AP3)]. All aligned examples have structural elements that impose upon the space that oxamniquine is predicted to occupy for productive turnover.

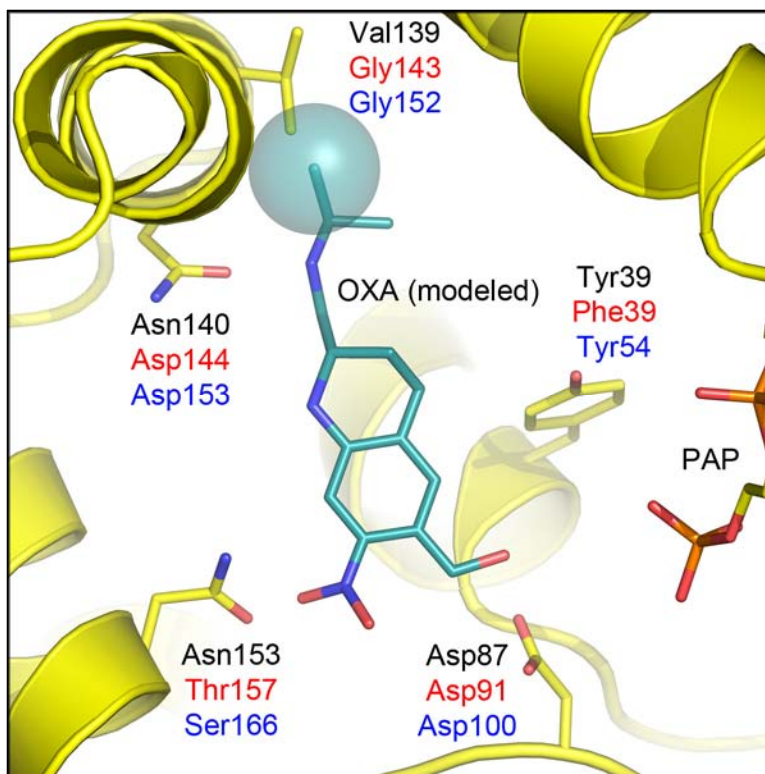

**SUPPLEMENTAL FIGURE 4:** Oxamniquine modeled into the SjSULT active site by superposition of the SmSULT:PAP:oxamniquine complex crystal structure (PDB entry 5BYK) onto the SjSULT structure (SmSULT residues in red, ShSULT residues in blue). The transparent sphere indicates a region for potential steric clash with oxamniquine and Val 139. Both SmSULT and ShSULT contain glycine at the equivalent position.

SUPPLEMENTAL TABLE 1. Products of the SULT reaction detected by continuous-flow mass spectrometry.

| Enzyme | Buffer                                                             | Compound                                                                                                                                                                                           | Observed m/z | Predicted m/z | Relative ion intensities |       |
|--------|--------------------------------------------------------------------|----------------------------------------------------------------------------------------------------------------------------------------------------------------------------------------------------|--------------|---------------|--------------------------|-------|
|        |                                                                    |                                                                                                                                                                                                    |              |               | 1.2 s                    | 6 s   |
| SmSULT | 50 mM 1,2-diamino ethane/acetate, 12.5 mM ammonium acetate, pH 8.0 | 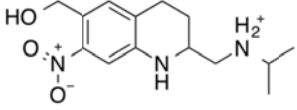<br>oxamniquine<br>(C <sub>14</sub> H <sub>22</sub> N <sub>3</sub> O <sub>3</sub> )                               | 280.1658     | 280.1656      | 100                      | 65    |
|        |                                                                    | <br>oxamniquine sulfate + Na <sup>+</sup><br>(C <sub>14</sub> H <sub>21</sub> N <sub>3</sub> O <sub>6</sub> SNa) | 382.1045     | 382.1043      | 0.16                     | 0.042 |
|        |                                                                    | <br>acetyl-oxamniquine<br>(C <sub>16</sub> H <sub>24</sub> N <sub>3</sub> O <sub>4</sub> )                       | 322.1762     | 322.1761      | 6.0                      | 13    |
|        |                                                                    | <br>oxamniquine-ethanediamine<br>(C <sub>16</sub> H <sub>28</sub> N <sub>5</sub> O <sub>2</sub> )               | 322.2240     | 322.2238      | 42                       | 100   |
|        | 12.5 mM ammonium acetate, pH 7.0                                   | oxamniquine                                                                                                                                                                                        | 280.1658     | 280.1656      | 100                      | 100   |
|        |                                                                    | oxamniquine sulfate + Na <sup>+</sup>                                                                                                                                                              | 382.1046     | 382.1043      | 0.99                     | 0.53  |
|        |                                                                    | acetyl-oxamniquine                                                                                                                                                                                 | 322.1762     | 322.1761      | 2.9                      | 7.6   |
| ShSULT | 50 mM 1,2-diamino ethane/acetate, 12.5 mM ammonium acetate, pH 8.0 | oxamniquine                                                                                                                                                                                        | 280.1659     | 280.1656      | 100                      | 100   |
|        |                                                                    | oxamniquine sulfate + Na <sup>+</sup>                                                                                                                                                              | 382.1047     | 382.1043      | 0.043                    | 0.22  |
|        |                                                                    | acetyl-oxamniquine                                                                                                                                                                                 | 322.1765     | 322.1761      | 2.7                      | 19    |
|        |                                                                    | oxamniquine-ethanediamine                                                                                                                                                                          | 322.2241     | 322.2238      | 8.4                      | 39    |
